# Supplementary material for: Vitamin D Deficiency Exacerbates Poor Sleep Outcomes with Endocrine-Disrupting Chemicals Exposure: A Large American Population Study
Source: MDPI journal article supplement (doi:10.3390/nu16091291), 2024-04-26
Supplement: s1 [file s1]

**Table S5. Names of urinary metabolites and their detection limits.**

| <b>Abbreviation of variable</b> | <b>Variable name</b>                    | <b>LOD</b> |
|---------------------------------|-----------------------------------------|------------|
| URXCNP                          | Mono(carboxyisononyl) phthalate         | 0.2        |
| URXCOP                          | Mono(carboxyisoctyl) phthalate          | 0.3        |
| URXECP                          | Mono-2-ethyl-5-carboxypentyl phthalate  | 0.4        |
| URXMBP                          | Mono-n-butyl phthalate                  | 0.4        |
| URXMC1                          | Mono-(3-carboxypropyl) phthalate        | 0.4        |
| URXMEP                          | Mono-ethyl phthalate                    | 1.2        |
| URXMHH                          | Mono-(2-ethyl-5-hydroxyhexyl) phthalate | 0.4        |
| URXMHP                          | Mono-(2-ethyl)-hexyl phthalate          | 0.8        |
| URXMOH                          | Mono-(2-ethyl-5-oxohexyl) phthalate     | 0.2        |
| URXMZP                          | Mono-benzyl phthalate                   | 0.3        |
| URXBP3                          | Benzophenone-3                          | 0.4        |
| URXBPH                          | Bisphenol A                             | 0.2        |
| URXTRS                          | Triclosan                               | 1.7        |
| URXMPB                          | Methyl paraben                          | 1.0        |
| URXPPB                          | Propyl paraben                          | 0.1        |
