# Supplementary material for: Vitamin D Deficiency Exacerbates Poor Sleep Outcomes with Endocrine-Disrupting Chemicals Exposure: A Large American Population Study
Source: MDPI journal article supplement (doi:10.3390/nu16091291), 2024-04-26
Supplement: s1 [file s1]

**Table S2. Sleep duration and EDCs concentrations grouped by vitamin D level.**

| <b>Environmental<br/>endocrine disruptors</b> | <b>Non-vitamin d<br/>deficiency<br/>(mean <math>\pm</math> SD)</b> | <b>Vitamin d<br/>deficiency<br/>(mean <math>\pm</math> SD)</b> | <b><math>\chi^2</math></b> | <b>P-value</b> |
|-----------------------------------------------|--------------------------------------------------------------------|----------------------------------------------------------------|----------------------------|----------------|
| Sleep duration                                | 6.89 $\pm$ 1.33                                                    | 6.51 $\pm$ 1.57                                                | 652048.871                 | <0.001         |
| BP3                                           | 3.22 $\pm$ 2.20                                                    | 2.31 $\pm$ 1.87                                                | 585115.079                 | <0.001         |
| BPH                                           | 0.51 $\pm$ 0.90                                                    | 0.51 $\pm$ 1.00                                                | 20755.865                  | <0.001         |
| TRS                                           | 2.63 $\pm$ 1.90                                                    | 2.34 $\pm$ 1.85                                                | 22153.448                  | <0.001         |
| MPB                                           | 4.03 $\pm$ 1.70                                                    | 4.09 $\pm$ 1.71                                                | 11530.968                  | <0.001         |
| PPB                                           | 1.98 $\pm$ 2.29                                                    | 1.89 $\pm$ 2.22                                                | 11600.378                  | <0.001         |
| CNP                                           | 1.00 $\pm$ 0.96                                                    | 0.78 $\pm$ 0.93                                                | 2366.760                   | <0.001         |
| ECP                                           | 2.79 $\pm$ 0.99                                                    | 2.71 $\pm$ 0.92                                                | 6335.713                   | <0.001         |
| MBP                                           | 2.39 $\pm$ 0.99                                                    | 2.46 $\pm$ 0.89                                                | 16565.781                  | <0.001         |
| MC1                                           | 0.99 $\pm$ 1.10                                                    | 0.78 $\pm$ 1.10                                                | 2898.803                   | <0.001         |
| MEP                                           | 4.02 $\pm$ 1.44                                                    | 4.21 $\pm$ 1.46                                                | 11067.224                  | <0.001         |
| MHH                                           | 2.35 $\pm$ 1.06                                                    | 2.29 $\pm$ 1.00                                                | 4.399                      | 0.036          |
| MHP                                           | 0.48 $\pm$ 1.06                                                    | 0.46 $\pm$ 0.96                                                | 37339.190                  | <0.001         |
| MOH                                           | 1.86 $\pm$ 1.00                                                    | 1.78 $\pm$ 0.95                                                | 166.970                    | <0.001         |
| BP3                                           | 1.59 $\pm$ 1.01                                                    | 1.74 $\pm$ 1.03                                                | 652048.871                 | <0.001         |
