# Supplementary material for: Vitamin D Deficiency Exacerbates Poor Sleep Outcomes with Endocrine-Disrupting Chemicals Exposure: A Large American Population Study
Source: MDPI journal article supplement (doi:10.3390/nu16091291), 2024-04-26
Supplement: s1 [file s1]

**Table S4. The correlation between EDCs metabolite exposure and sleep duration  
(grouped by vitamin D level).**

| Chemicals        | Model I                        |              | Model II                        |                  |
|------------------|--------------------------------|--------------|---------------------------------|------------------|
|                  | $\beta$ (95%CI)                | P            | $\beta$ (95%CI)                 | P                |
| <b>Vitamin D</b> |                                |              |                                 |                  |
| BP3              | 0.020 (-0.005, 0.031)          | 0.160        | -0.009 (-0.025, 0.014)          | 0.558            |
| TRS              | <b>0.035 (0.005, 0.046)*</b>   | <b>0.014</b> | 0.017 (-0.008, 0.033)           | 0.236            |
| MEP              | <b>-0.041(-0.065, -0.013)*</b> | <b>0.004</b> | <b>-0.052 (-0.077, -0.023)*</b> | <b>&lt;0.001</b> |
| <b>Vitamin D</b> |                                |              |                                 |                  |
| BP3              | 0.040 (-0.041, 0.106)          | 0.382        | 0.024 (-0.059, 0.097)           | 0.633            |
| TRS              | <b>0.134 (0.036, 0.185)*</b>   | <b>0.004</b> | <b>0.121 (0.023, 0.177)*</b>    | <b>0.011</b>     |
| MEP              | -0.009 (-0.102, 0.083)         | 0.842        | -0.014 (-0.110, 0.080)          | 0.760            |

**Model 1 :** Rough model.

**Model 2 :** Adjusted according to age, gender, race, education level, marital status, family PIR, physical activity, smoking, drinking, BMI and urinary creatinine.

\* Means  $P < 0.05$
