# Supplementary material for: Vitamin D Deficiency Exacerbates Poor Sleep Outcomes with Endocrine-Disrupting Chemicals Exposure: A Large American Population Study
Source: MDPI journal article supplement (doi:10.3390/nu16091291), 2024-04-26
Supplement: s1 [file s1]

**Table S3. EDCs metabolite distribution in the population (grouped by vitamin D level).**

| Environmental<br>endocrine<br>disruptors(ng/mL) | Detection rate<br>N (%) | Mean   | Percentiles |       |       |        |         |  |
|-------------------------------------------------|-------------------------|--------|-------------|-------|-------|--------|---------|--|
|                                                 |                         |        | P5          | P25   | P50   | P75    | P95     |  |
| Vitamin D is normal                             |                         |        |             |       |       |        |         |  |
| CNP                                             | 4822 (96.32)            | 59.19  | 0.67        | 1.37  | 2.30  | 4.21   | 13.51   |  |
| ECP                                             | 4993 (99.74)            | 32.02  | 4.48        | 9.09  | 15.13 | 27.99  | 94.99   |  |
| MBP                                             | 4874 (97.36)            | 36.46  | 2.41        | 7.00  | 12.00 | 20.60  | 50.40   |  |
| MC1                                             | 4764 (95.17)            | 23.41  | 0.55        | 1.26  | 2.24  | 4.35   | 16.60   |  |
| MEP                                             | 5001 (99.90)            | 6.99   | 7.96        | 22.50 | 55.01 | 166.18 | 990.32  |  |
| MHH                                             | 4977 (99.42)            | 263.15 | 2.39        | 5.45  | 9.60  | 18.21  | 67.63   |  |
| MHP                                             | 3372 (67.36)            | 25.74  | 0.35        | 0.79  | 1.51  | 2.94   | 10.38   |  |
| MOH                                             | 4959 (99.06)            | 3.91   | 1.65        | 3.51  | 5.92  | 10.82  | 37.08   |  |
| MZP                                             | 4893 (96.94)            | 14.80  | 0.94        | 2.60  | 4.91  | 9.54   | 26.91   |  |
| BP3                                             | 4831 (96.50)            | 8.71   | 0.94        | 4.08  | 14.00 | 69.22  | 1375.96 |  |
| BPH                                             | 4581 (91.51)            | 313.78 | 0.45        | 0.94  | 1.57  | 2.75   | 7.36    |  |
| TRS                                             | 3781 (75.53)            | 3.34   | 1.02        | 2.89  | 8.68  | 44.01  | 520.06  |  |
| MPB                                             | 4985 (99.58)            | 90.44  | 3.92        | 15.23 | 68.71 | 244.89 | 880.98  |  |
| PPB                                             | 4745 (94.79)            | 224.47 | 0.22        | 1.09  | 8.15  | 51.94  | 267.55  |  |
| Vitamin D deficiency                            |                         |        |             |       |       |        |         |  |
| CNP                                             | 450 (95.74)             | 4.05   | 0.51        | 1.15  | 1.97  | 3.57   | 9.59    |  |
| ECP                                             | 470 (100.00)            | 26.62  | 3.79        | 8.05  | 14.30 | 26.86  | 94.32   |  |
| MBP                                             | 463 (98.51)             | 19.18  | 2.56        | 7.40  | 12.79 | 21.96  | 53.39   |  |

|     |              |        |      |       |       |        |         |
|-----|--------------|--------|------|-------|-------|--------|---------|
| MC1 | 451 (95.96)  | 4.50   | 0.43 | 1.03  | 1.90  | 3.62   | 16.64   |
| MEP | 470 (100.00) | 258.68 | 8.24 | 24.84 | 62.77 | 197.19 | 1096.76 |
| MHH | 468 (99.57)  | 18.87  | 2.45 | 5.08  | 9.71  | 18.31  | 65.99   |
| MHP | 358 (76.17)  | 2.90   | 0.37 | 0.82  | 1.51  | 2.90   | 9.03    |
| MOH | 465 (98.94)  | 10.70  | 1.66 | 3.22  | 5.74  | 10.62  | 35.80   |
| MZP | 465 (98.94)  | 10.07  | 1.07 | 2.97  | 5.52  | 11.40  | 31.40   |
| BP3 | 456 (97.02)  | 99.83  | 0.66 | 2.49  | 7.00  | 22.45  | 423.59  |
| BPH | 436 (92.77)  | 3.52   | 0.38 | 0.94  | 1.63  | 2.85   | 8.10    |
| TRS | 362 (77.02)  | 61.81  | 0.85 | 2.26  | 6.30  | 26.69  | 379.67  |
| MPB | 465 (98.94)  | 212.88 | 3.25 | 17.02 | 73.03 | 233.05 | 875.65  |
| PPB | 446 (94.89)  | 43.58  | 0.19 | 1.15  | 8.16  | 48.01  | 199.27  |

---
