# Supplementary material for: Vitamin D Deficiency Exacerbates Poor Sleep Outcomes with Endocrine-Disrupting Chemicals Exposure: A Large American Population Study
Source: MDPI journal article supplement (doi:10.3390/nu16091291), 2024-04-26
Supplement: s1 [file s1]

**Table S1. The distribution of the urinary metabolites in the study population**

| <b>Environmental endocrine<br/>disruptors (ng/mL)</b> | <b>Detection rate<br/>N (%)</b> | <b>Mean</b> | <b>Percentiles</b> |            |            |            |            |
|-------------------------------------------------------|---------------------------------|-------------|--------------------|------------|------------|------------|------------|
|                                                       |                                 |             | <b>P5</b>          | <b>P25</b> | <b>P50</b> | <b>P75</b> | <b>P95</b> |
| CNP                                                   | 5272 (96.27)                    | 43.58       | 0.51               | 1.15       | 1.97       | 3.57       | 9.59       |
| COP                                                   | 5404 (98.69)                    | 4.05        | 1.68               | 3.76       | 8.91       | 28.02      | 106.57     |
| ECP                                                   | 5463 (99.76)                    | 27.84       | 3.79               | 8.05       | 14.30      | 26.86      | 94.32      |
| MBP                                                   | 5337 (97.46)                    | 26.62       | 2.56               | 7.40       | 12.79      | 21.96      | 53.39      |
| MC1                                                   | 5215 (95.23)                    | 19.18       | 0.43               | 1.03       | 1.90       | 3.62       | 16.64      |
| MEP                                                   | 5471 (99.91)                    | 4.50        | 8.24               | 24.84      | 62.77      | 197.19     | 1096.7     |
| MHH                                                   | 5445 (99.43)                    | 258.68      | 2.45               | 5.08       | 9.71       | 18.31      | 65.99      |
| MHP                                                   | 3730 (68.12)                    | 18.87       | 0.37               | 0.82       | 1.51       | 2.90       | 9.03       |
| MOH                                                   | 5424 (99.05)                    | 2.90        | 1.66               | 3.22       | 5.74       | 10.62      | 35.80      |
| MZP                                                   | 5358 (97.85)                    | 10.70       | 1.07               | 2.97       | 5.52       | 11.40      | 31.40      |
| BP3                                                   | 5287 (96.55)                    | 10.07       | 0.66               | 2.49       | 7.00       | 22.45      | 423.59     |
| BPH                                                   | 5017 (91.62)                    | 99.83       | 0.38               | 0.94       | 1.63       | 2.85       | 8.10       |
| TRS                                                   | 4143 (75.66)                    | 3.52        | 0.85               | 2.26       | 6.30       | 26.69      | 379.67     |
| MPB                                                   | 5450 (99.53)                    | 61.81       | 3.25               | 17.02      | 73.03      | 233.05     | 875.65     |
| PPB                                                   | 5191 (94.80)                    | 212.88      | 0.19               | 1.15       | 8.16       | 48.01      | 199.27     |
