# Supplementary figures and images for: Vitamin D Deficiency Exacerbates Poor Sleep Outcomes with Endocrine-Disrupting Chemicals Exposure: A Large American Population Study
Source: MDPI journal article supplement (doi:10.3390/nu16091291), 2024-04-26

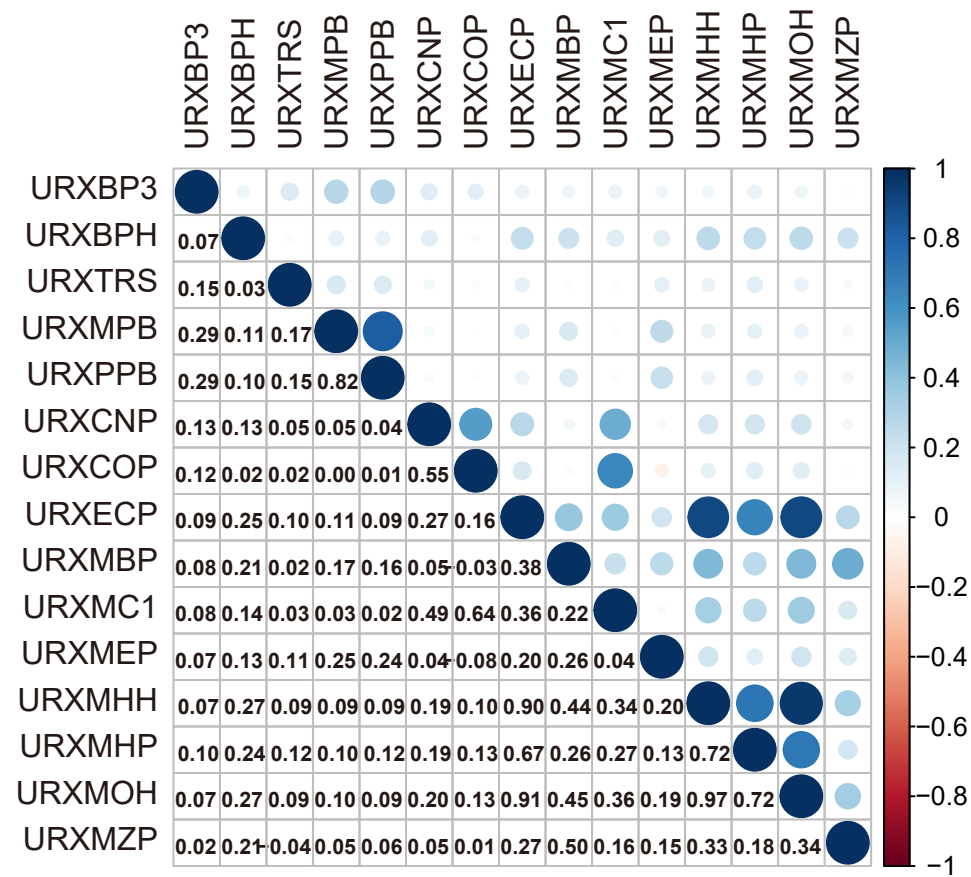

Supplement: s1 [file s1]

A

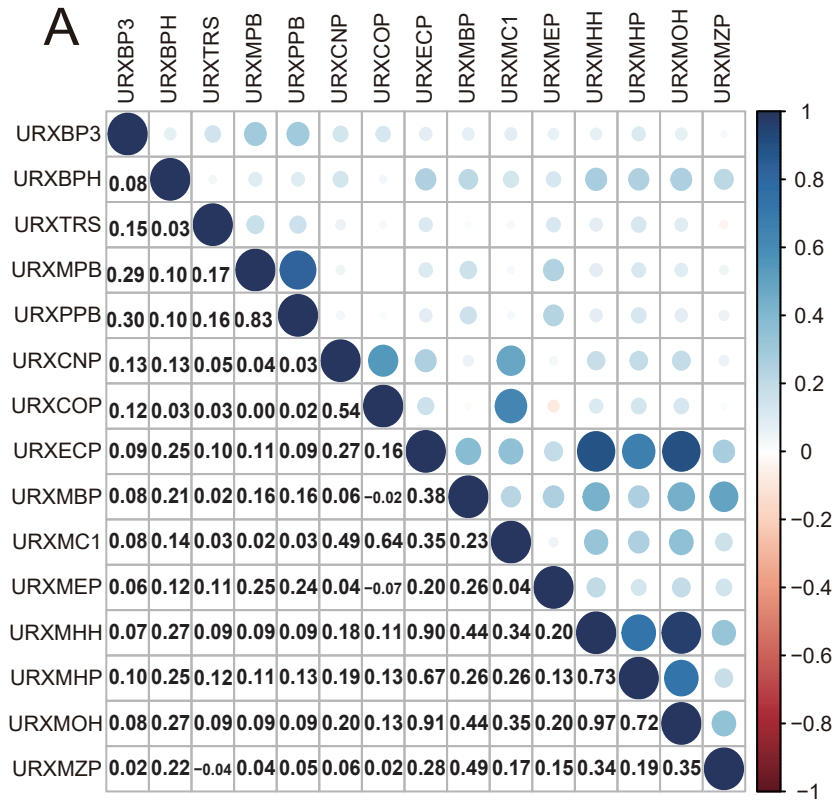

B

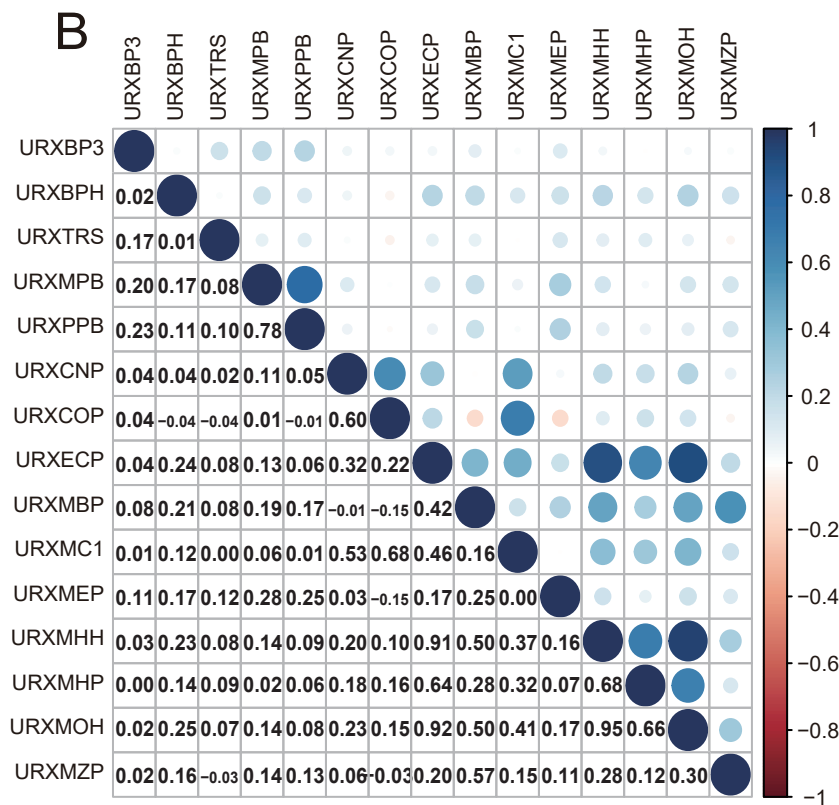

Supplement: s1 [file s1]
